# Supplementary material
Source: PubMed Central journal article supplement (PMC4675691)
Supplement: NIHMS708090-supplement-Supp_FigureS1-S7.pdf [file NIHMS708090-supplement-Supp_FigureS1-S7.pdf]

Supplementary material-1

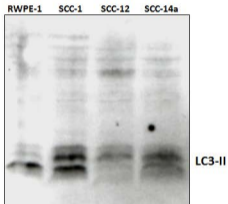

Figure 1C- Full length western blot

Supplementary material-2

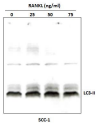

Figure 3A- Full length western blot.

Supplementary material-3

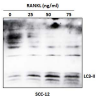

Figure 3A- Full length western blot

Supplementary material-4

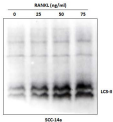

Figure 3A- Full length western blot

### Supplementary material-5

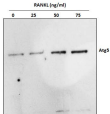

Figure 3B- Full length western blot

Supplementary material-5

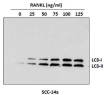

Figure 4A- Full length western blot

Supplementary material-7

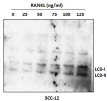

Figure 4A- Full length western blot
